# Supplementary material for: Fe2P encapsulated in carbon nanowalls decorated with well-dispersed Fe3C nanodots for efficient hydrogen evolution and oxygen reduction reactions
Source: Royal Society of Chemistry journal article supplement (doi:10.1039/d1nr03380h), 2021-01-01
Supplement: d1nr03380h1.pdf [file d1nr03380h1.pdf]

Supporting Information (SI):

**Fe<sub>2</sub>P-encapsulated in carbon nanowalls decorated by well-dispersed Fe<sub>3</sub>C nanodots for efficient hydrogen evolution and oxygen reduction reaction**

Liangliang Feng <sup>a</sup>, Xiao Zhang <sup>a</sup>, Jianfeng Huang <sup>a,\*</sup>, Danyang He <sup>a</sup>, Xiaoyi Li <sup>a</sup>,  
Qianqian Liu <sup>a</sup>, Yongqiang Feng <sup>a</sup>, Guodong Li <sup>b</sup>, Guanghui Xu <sup>c</sup>, Liyun Cao <sup>a,\*</sup>

<sup>a</sup> *School of Material Science and Engineering, International S&T Cooperation Foundation of Shaanxi Province, Xi'an Key Laboratory of Green Manufacture of Ceramic Materials, Key Laboratory of Auxiliary and Technology for Chemical Industry, Ministry of Education, Shaanxi University of Science and Technology, Xi'an, 710021, China*

<sup>b</sup> *State Key Laboratory of Inorganic Synthesis and Preparative Chemistry, College of Chemistry, Jilin University, Changchun 130012, China*

<sup>c</sup> *Nano Science and Technology Institute, University of Science and Technology of China, Suzhou, 215123, China*

E-mail: [huangjf@sust.edu.cn](mailto:huangjf@sust.edu.cn); [2644245930@qq.com](mailto:2644245930@qq.com)

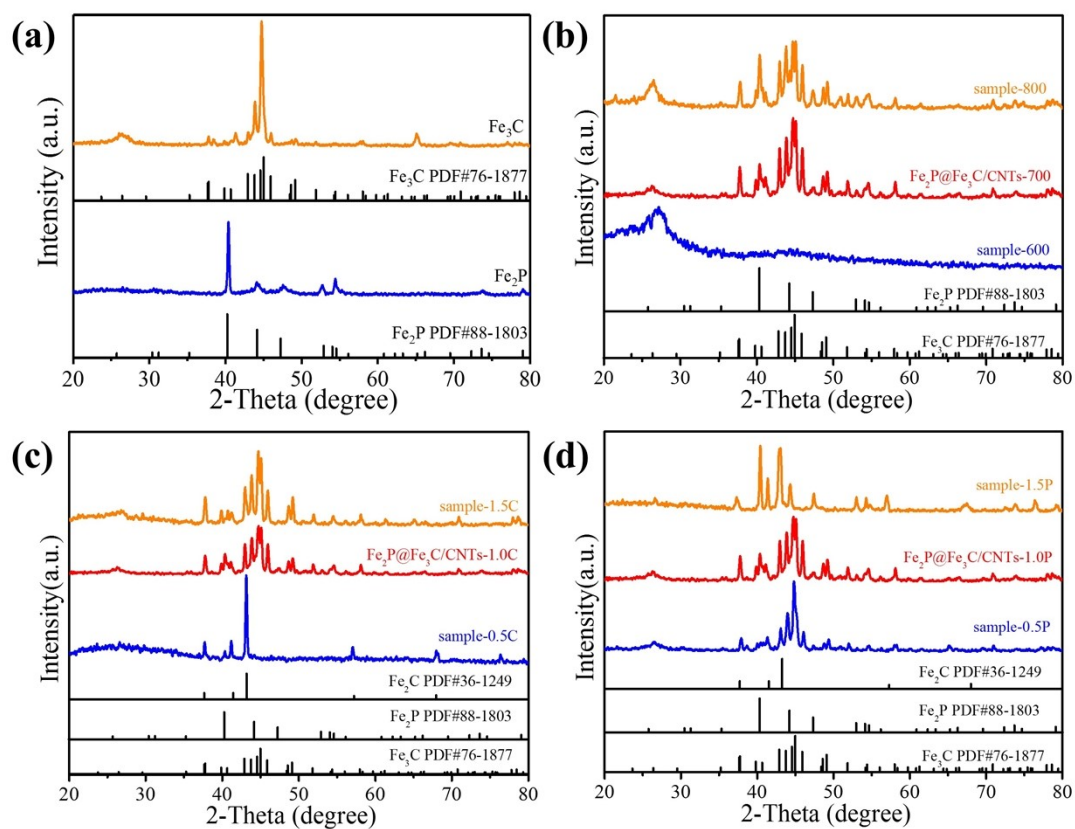

**Figure S1.** XRD patterns of (a)  $\text{Fe}_3\text{C}$  and  $\text{Fe}_2\text{P}$ ; (b) sample-600,  $\text{Fe}_2\text{P}@Fe_3\text{C}/\text{CNTs}$ -700 and sample-800; (c) sample-0.5C,  $\text{Fe}_2\text{P}@Fe_3\text{C}/\text{CNTs}$ -1.0C and sample-1.5C; (d) sample-0.5P,  $\text{Fe}_2\text{P}@Fe_3\text{C}/\text{CNTs}$ -1.0P and sample-1.5P.

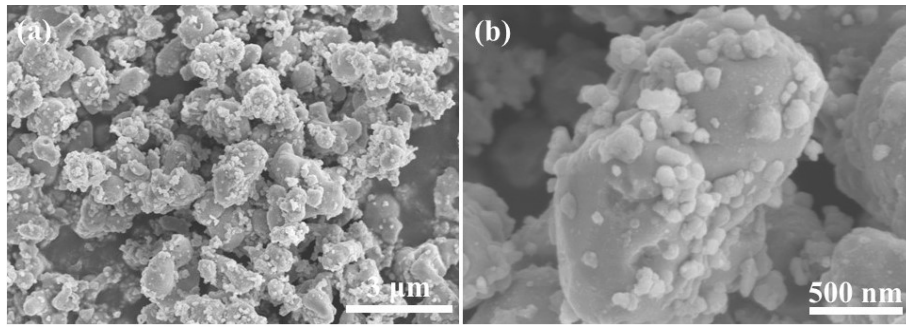

**Figure S2.** SEM images of sample-0.5C.

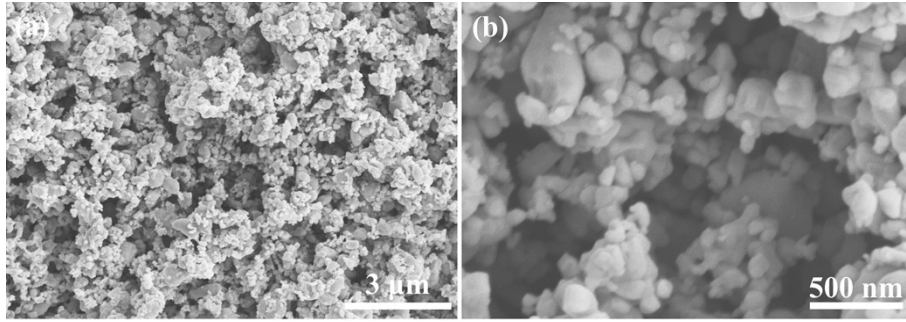

**Figure S3.** SEM images of sample-1.5P.

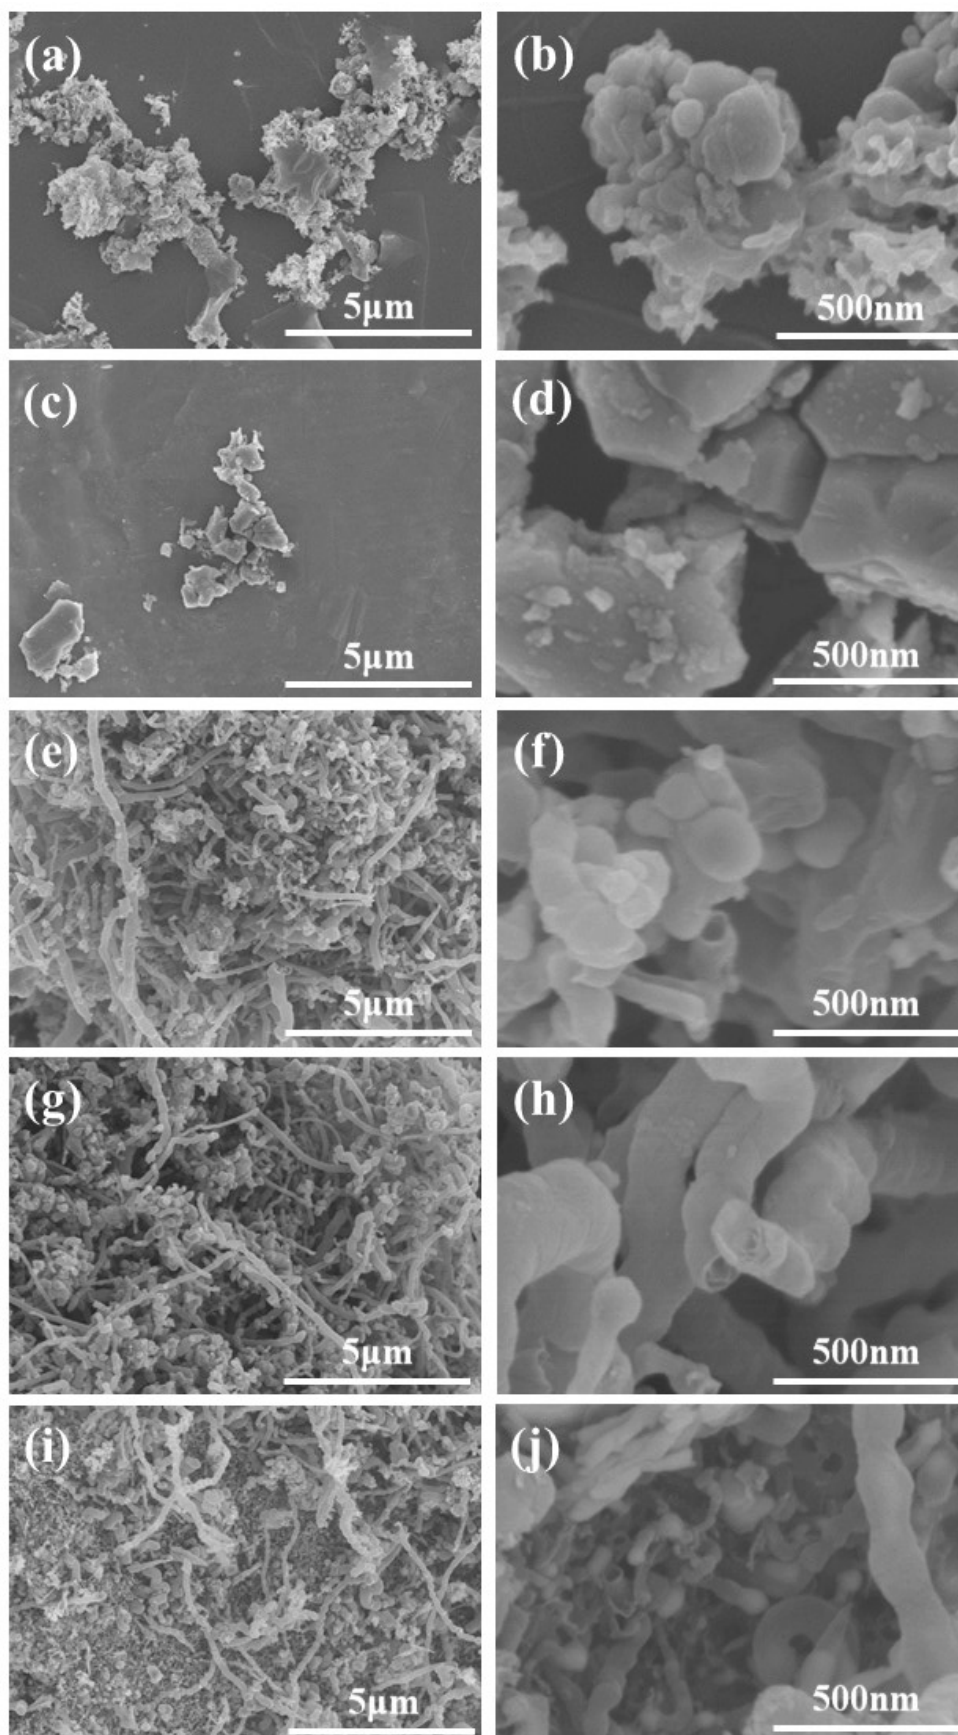

**Figure S4.** SEM images of (a, b) Fe<sub>3</sub>C, (c, d) Fe<sub>2</sub>P, (e, f) sampe-800, (g, h) sample-1.5C and (i, j) sample-0.5P.

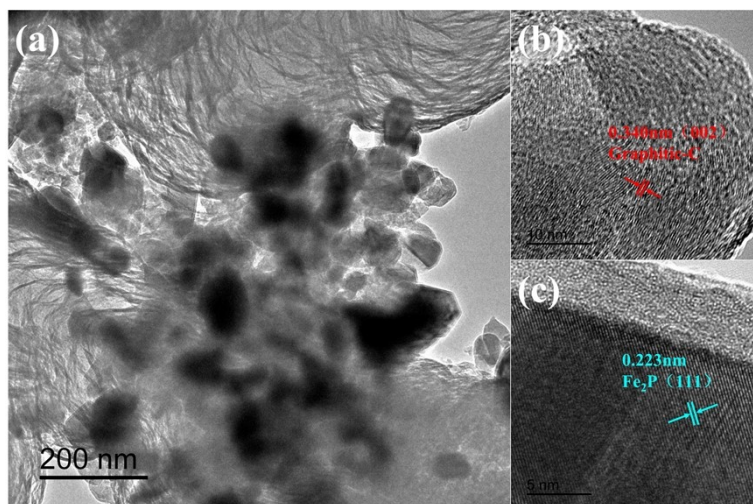

**Figure S5.** (a) TEM image of  $\text{Fe}_2\text{P}@Fe_3\text{C}/\text{CNTs}$ ; (b, c) High-resolution TEM images of  $\text{Fe}_2\text{P}@Fe_3\text{C}/\text{CNTs}$ .

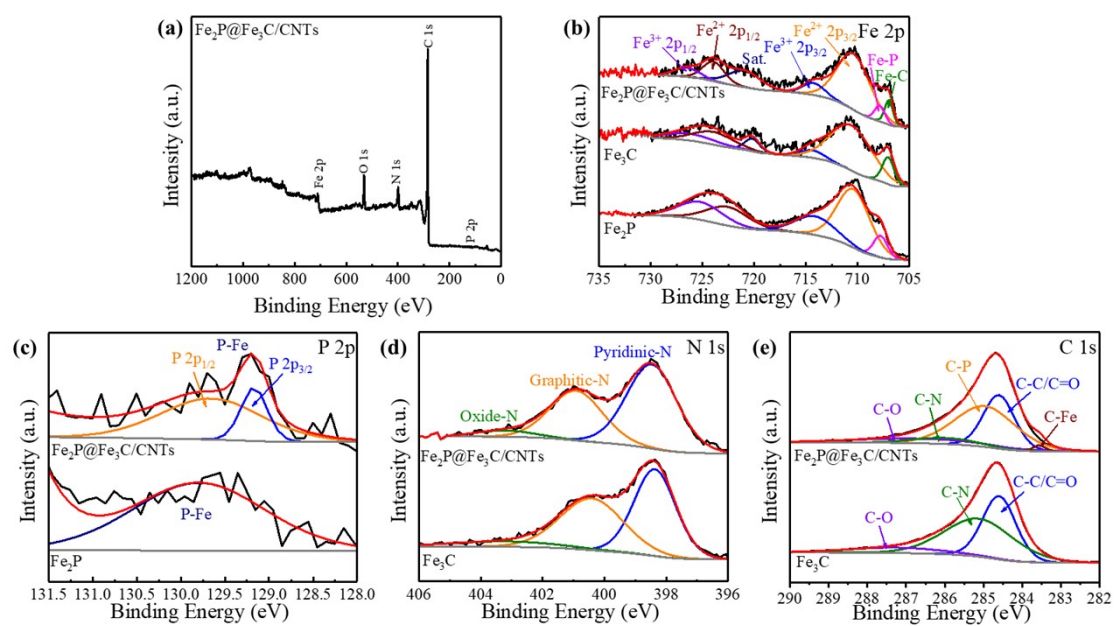

**Figure S6.** (a) The survey spectrum of  $\text{Fe}_2\text{P}@/\text{Fe}_3\text{C}/\text{CNTs}$ . High-resolution XPS spectra: (b) Fe 2p, (c) P 2p, (d) N 1s and (e) C 1s of  $\text{Fe}_2\text{P}@/\text{Fe}_3\text{C}/\text{CNTs}$ ,  $\text{Fe}_3\text{C}$  and  $\text{Fe}_2\text{P}$ .

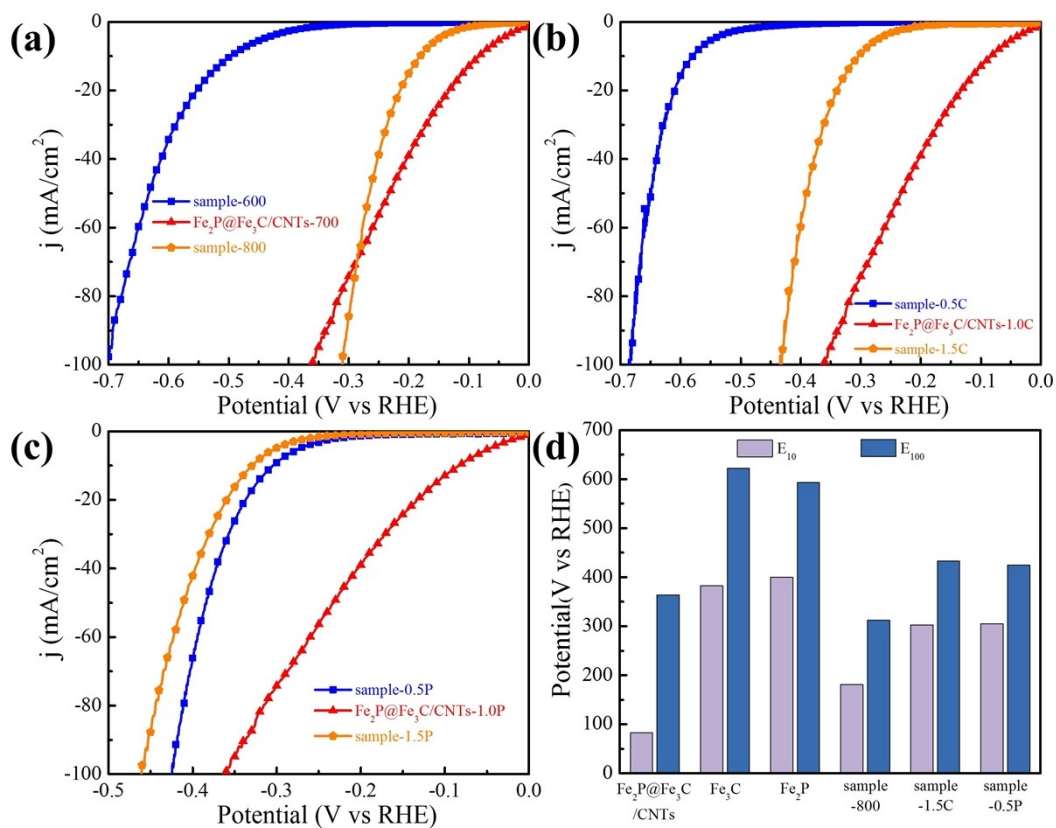

**Figure S7.** (a) HER Polarization curves of sample-600,  $\text{Fe}_2\text{P}@/\text{Fe}_3\text{C}/\text{CNTs}$ -700 and sample-800. (b) HER Polarization curves of sample-0.5C,  $\text{Fe}_2\text{P}@/\text{Fe}_3\text{C}/\text{CNTs}$ -1.0C and sample-1.5C. (c) HER Polarization curves of sample-0.5P,  $\text{Fe}_2\text{P}@/\text{Fe}_3\text{C}/\text{CNTs}$ -1.0P and sample-1.5P. (d) The potentials of  $\text{Fe}_2\text{P}@/\text{Fe}_3\text{C}/\text{CNTs}$ ,  $\text{Fe}_3\text{C}$ ,  $\text{Fe}_2\text{P}$ , sample-800, sample-1.5C and sample-0.5P at 10 mA/cm<sup>2</sup> ( $E_{10}$ ) and 100 mA/cm<sup>2</sup> ( $E_{100}$ ).



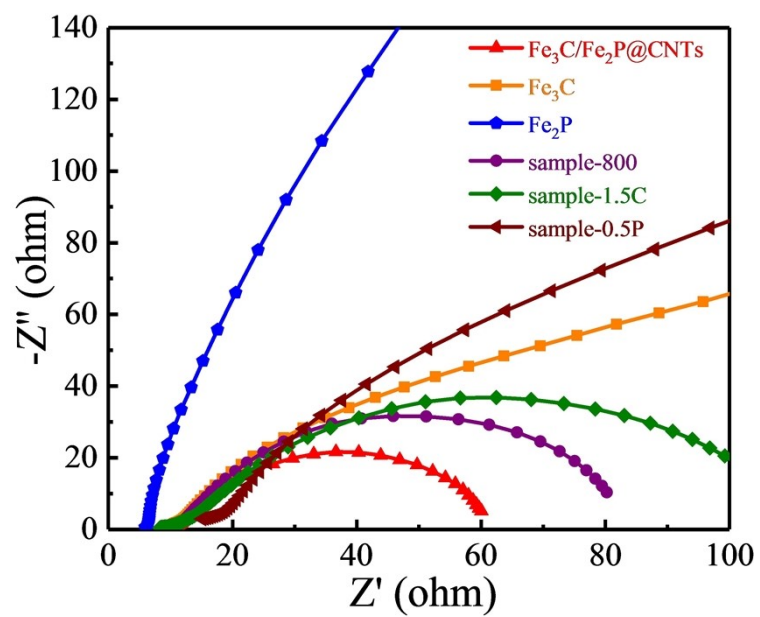

**Figure S8.** Electrochemical impedance spectroscopy (EIS) Nyquist plots of Fe<sub>2</sub>P@Fe<sub>3</sub>C/CNTs, Fe<sub>3</sub>C, Fe<sub>2</sub>P, sample-800, sample-1.5C and sample-0.5P.

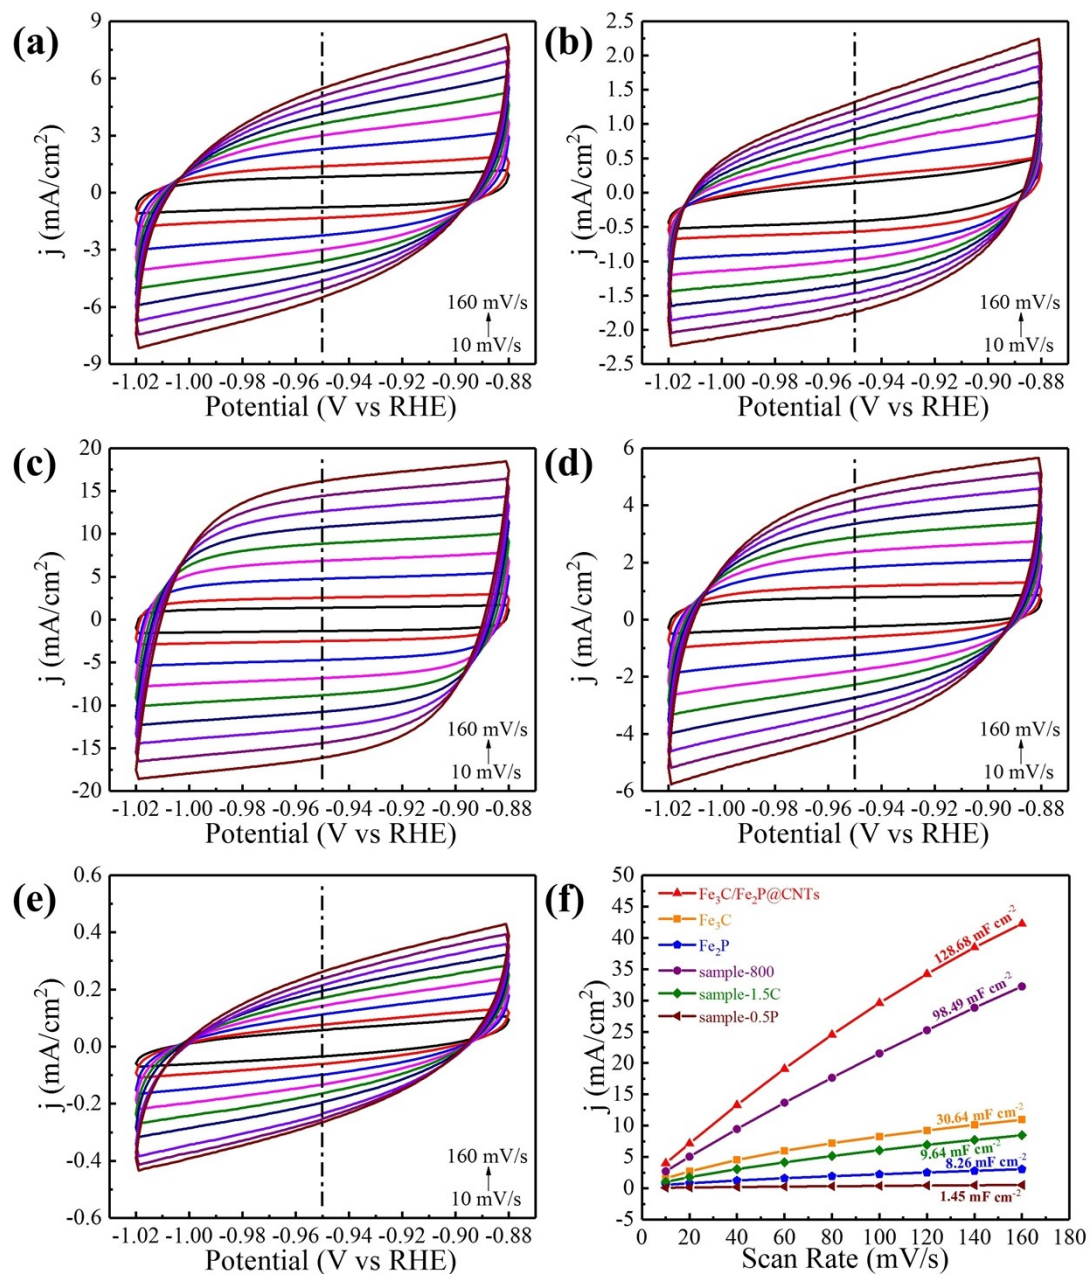

**Figure S9.** CV curves of (a) Fe<sub>3</sub>C, (b) Fe<sub>2</sub>P, (c) sample-800, (d) sample-1.5C and (e) sample-0.5P. (f) Electrochemical double-layer capacitance ( $C_{dl}$ ) of Fe<sub>2</sub>P@Fe<sub>3</sub>C/CNTs, Fe<sub>3</sub>C, Fe<sub>2</sub>P, sample-800, sample-1.5C and sample-0.5P.

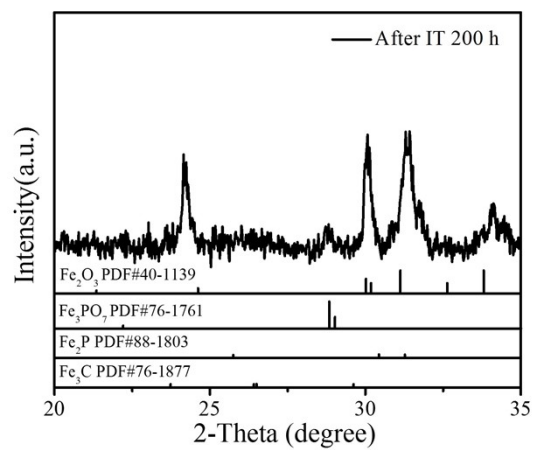

**Figure S10.** The enlarged XRD pattern of Fe<sub>2</sub>P@Fe<sub>3</sub>C/CNTs.

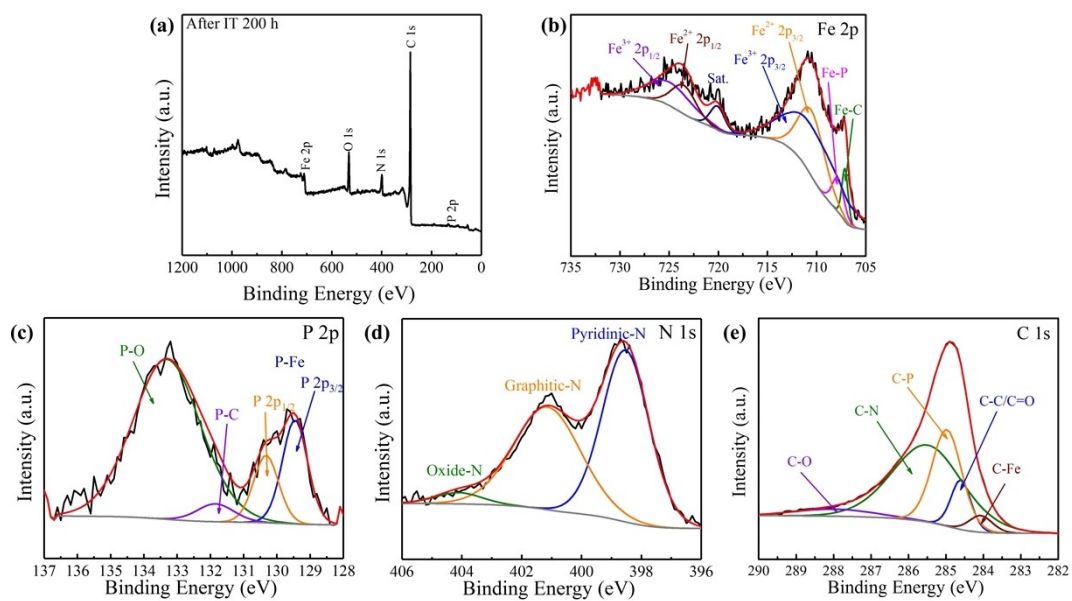

**Figure S11.** High-resolution XPS spectra: (a) Survey, (b) Fe 2p, (c) P 2p, (d) N 1s and (e) C 1s of Fe<sub>2</sub>P@Fe<sub>3</sub>C/CNTs after the stability test of i-t curve for 200 h at pH 14.

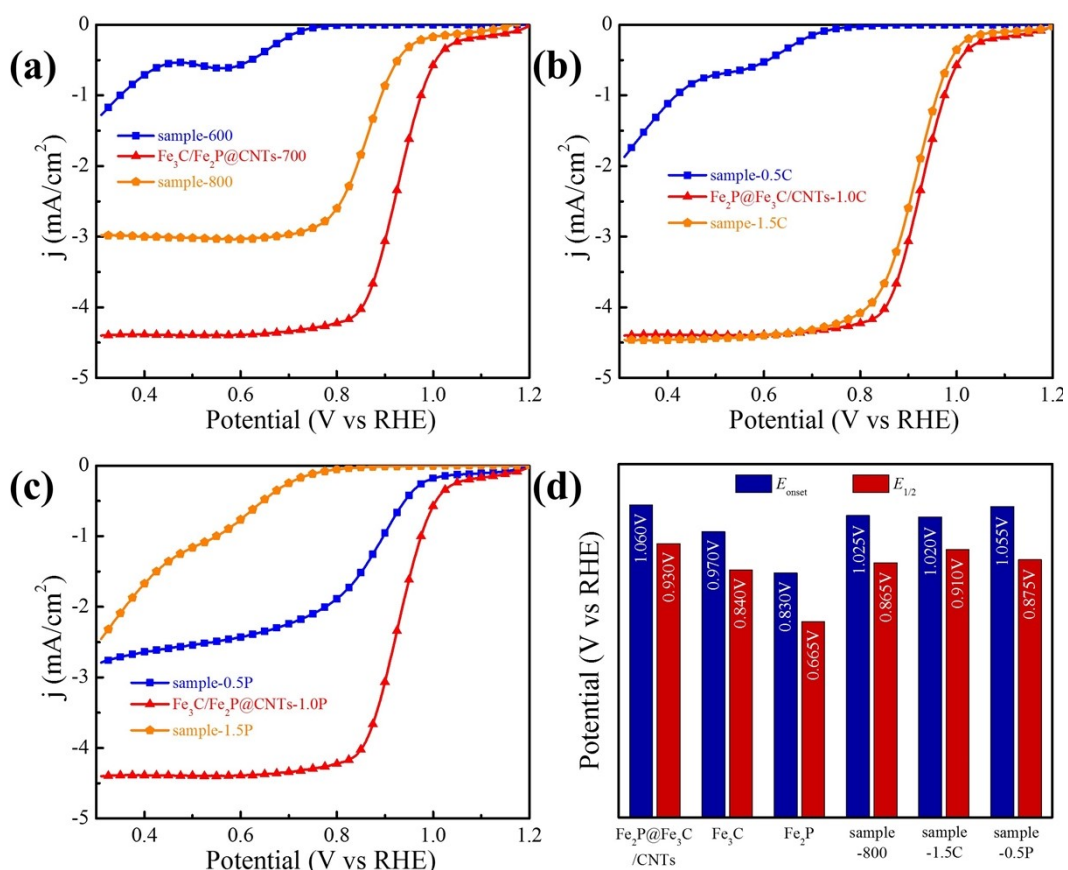

**Figure S12.** (a) ORR LSV curves of sample-600, Fe<sub>2</sub>P@Fe<sub>3</sub>C/CNTs-700 and sample-800; (b) ORR LSV curves of sample-0.5C, Fe<sub>2</sub>P@Fe<sub>3</sub>C/CNTs-1.0C and sample-1.5C; (c) ORR LSV curves of sample-0.5P, Fe<sub>2</sub>P@Fe<sub>3</sub>C/CNTs-1.0P and sample-1.5P; (d) Onset potential ( $E_{\text{onset}}$ ) and half-wave potential ( $E_{1/2}$ ) of Fe<sub>2</sub>P@Fe<sub>3</sub>C/CNTs, Fe<sub>3</sub>C, Fe<sub>2</sub>P, sample-800, sample-1.5C and sample-0.5P in O<sub>2</sub>-saturated 0.1 M KOH solutions with a rotation speed of 1600 rpm and a sweep rate of 10 mV/s.

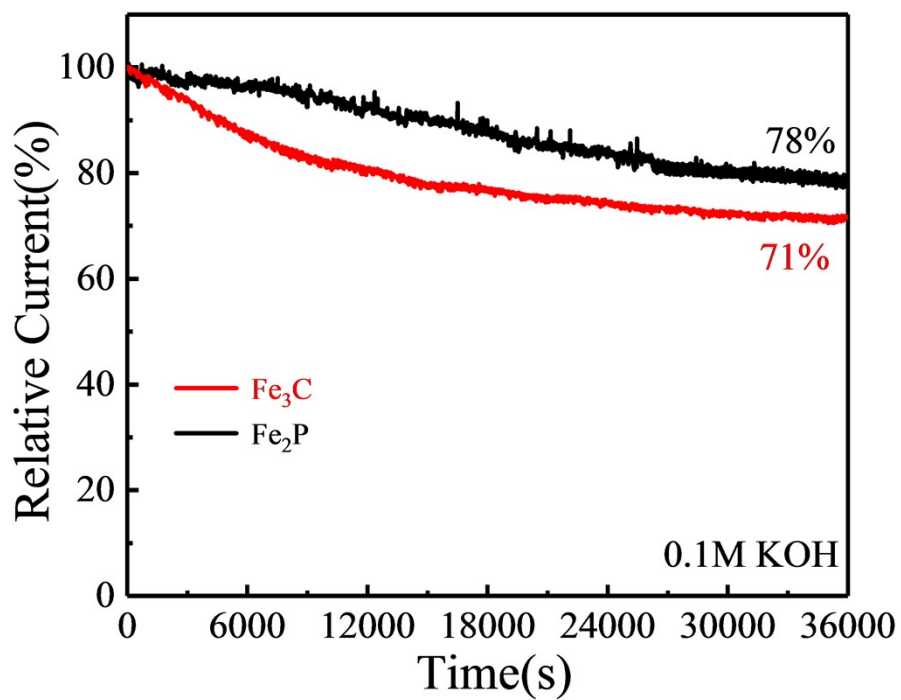

**Figure S13.** *I-t* curves obtained for ORR with Fe<sub>3</sub>C and Fe<sub>2</sub>P in 0.1 M KOH solutions.

**Table S1.** Summary of the potentials for all the compared electrocatalysts at 10

mA/cm<sup>2</sup> (E<sub>10</sub>) and 100 mA/cm<sup>2</sup> (E<sub>100</sub>).

|                                             | E <sub>10</sub> (V vs. RHE) | E <sub>100</sub> (V vs. RHE) |
|---------------------------------------------|-----------------------------|------------------------------|
| <b>Fe<sub>2</sub>P@Fe<sub>3</sub>C/CNTs</b> | 83 mV                       | 364 mV                       |
| <b>sample-600</b>                           | 497 mV                      | 702 mV                       |
| <b>sample-800</b>                           | 181 mV                      | 312 mV                       |
| <b>sample-0.5C</b>                          | 580 mV                      | 685 mV                       |
| <b>sample-1.5C</b>                          | 303 mV                      | 433 mV                       |
| <b>sample-0.5P</b>                          | 305 mV                      | 425 mV                       |
| <b>sample-1.5P</b>                          | 329 mV                      | 462 mV                       |
| <b>Fe<sub>3</sub>C</b>                      | 383 mV                      | 622 mV                       |
| <b>Fe<sub>2</sub>P</b>                      | 400 mV                      | 593 mV                       |
| <b>25% Pt/C</b>                             | 28 mV                       | 183 mV                       |
| <b>Pure GCE</b>                             | 1530 mV                     | 1787 mV                      |

**Table S2.** The details for calculated fractions of each iron species in the Fe 2p XPS spectrum.

| Fraction of<br>each iron species                      | Fe-C [%]                                    | Fe-P [%] | Fe <sup>2+</sup> [%] | Fe <sup>3+</sup> [%] | Satellite |
|-------------------------------------------------------|---------------------------------------------|----------|----------------------|----------------------|-----------|
|                                                       | <b>Fe<sub>2</sub>P@Fe<sub>3</sub>C/CNTs</b> | 5.55     | 4.39                 | 61.87                | 13.59     |
| <b>Fe<sub>2</sub>P@Fe<sub>3</sub>C/CNTs-<br/>200h</b> | 4.44                                        | 5.53     | 32.78                | 52.54                | 4.71      |

**Table S3.** Comparison of HER performance of this work with recently reported similar catalysts in 1.0 M KOH.

| Catalysts                                                  | $E_{10}$ (V vs. RHE) | Tafel slope (mV/dec) | stability   | Reference                                                   |
|------------------------------------------------------------|----------------------|----------------------|-------------|-------------------------------------------------------------|
| <b>Fe<sub>2</sub>P@Fe<sub>3</sub>C/CNTs</b>                | 83                   | 53                   | 200 h       | This work                                                   |
| <b>Ni-GF/Fe<sub>3</sub>C</b>                               | 93                   | 63                   | 20 h        | Adv. Energy Mater. 2020, 10, 2002260                        |
| <b>FNP</b>                                                 | 235                  | 76                   | 16 h        | Chemical Engineering Journal 390 (2020) 124515              |
| <b>Ni<sub>2</sub>P-Fe<sub>2</sub>P/NF</b>                  | 128                  | 86                   | 24 h        | Adv. Funct. Mater. 2020, 2006484                            |
| <b>Fe<sub>3</sub>C-Co/NC</b>                               | 238                  | 108.8                |             | Adv. Funct. Mater. 2019, 29, 1901949                        |
| <b>Fe<sub>3</sub>C@G</b>                                   | 264                  |                      | 14 h        | Applied Catalysis B: Environmental 248 (2019) 277-285       |
| <b>NHPBAP</b>                                              | 121                  | 67                   | 20 h        | Adv. Energy Mater. 2018, 1800484                            |
| <b>Fe<sub>5</sub>C<sub>2</sub>-Fe<sub>3</sub>C@NC</b>      | 209                  | 155                  | 1000 cycles | Dalton Trans., 2019,48, 4636-4642                           |
| <b>Fe<sub>3</sub>C/Mo<sub>2</sub>C-1:2</b>                 | 172                  | 87.8                 | 50 h        | ChemSusChem 2020,13,5280-5287                               |
| <b>P9.03%-(Ni, Fe)<sub>3</sub>S<sub>2</sub>/NF</b>         | 98                   | 88                   | 15 h        | ACS Appl. Mater. Interfaces 2019, 11, 27667-27676           |
| <b>Fe<sub>2</sub>P/CoP/Ni<sub>5</sub>P<sub>4</sub>/RGO</b> | 57                   | 47                   | 24 h        | ACS Sustainable Chem. Eng. 2019, 7, 13523-13531             |
| <b>0.75-NC-Fe<sub>x</sub>P</b>                             | 193                  | 60                   |             | ChemElectroChem 2019, 6, 3437-3444                          |
| <b>CoFeSP/CNT</b>                                          | 130                  | 70                   | 50 h        | Electrochimica Acta 318 (2019) 892-900                      |
| <b>Ni<sub>2</sub>P/Fe<sub>2</sub>P/NF</b>                  | 115                  | 193.6                | 20 h        | Journal of Colloid and Interface Science 541 (2019) 279-286 |
| <b>FeCNFs-NP</b>                                           | ~250                 | 100                  |             | Journal of Power Sources 413 (2019) 367-375                 |
| <b>CoFeP NFs/NPCNT</b>                                     | 137                  | 64.1                 | 40 h        | Nanoscale, 2019, 11, 17031-17040                            |
| <b>Ni(OH)<sub>2</sub>-Fe<sub>2</sub>P/TM</b>               | 76                   | 105                  | 20 h        | Chem. Commun., 2018, 54 , 1201-1204                         |



**Table S4.** Comparison of ORR performance of this work with recently reported similar catalysts in 0.1 M KOH.

| Catalysts                                               | $E_{\text{onset}}$ (V vs. RHE) | $E_{1/2}$ (V vs. RHE) | $n^a$     | Reference                                            |
|---------------------------------------------------------|--------------------------------|-----------------------|-----------|------------------------------------------------------|
| <b>Fe<sub>2</sub>P@Fe<sub>3</sub>C/CNTs</b>             | 1.06                           | 0.93                  | 3.95      | This work                                            |
| <b>Fe/Fe<sub>3</sub>C@NC-G-2</b>                        | 0.97                           | 0.88                  | 3.98      | Chemical Engineering Journal 401 (2020) 126001       |
| <b>Fe<sub>3</sub>C@MHNFs</b>                            |                                | 0.9                   | about 4   | J. Mater. Chem. A, 2020,8, 18125-18131               |
| <b>Fe<sub>2</sub>N/C</b>                                | 1                              | 0.86                  | 3.97      | Nano Research 14, 122-130 (2021)                     |
| <b>CNCo-5@Fe-2</b>                                      | 0.971                          | 0.861                 | 3.9       | Applied Catalysis B: Environmental 261 (2020) 118224 |
| <b>C-ZIF/LFP</b>                                        | 0.98                           | 0.88                  | 3.92      | Nano Research 13, 818–823 (2020)                     |
| <b>CNS-900</b>                                          | 0.976                          | 0.844                 | 3.96      | J. Mater. Chem. A, 2019, 7, 11321-11330              |
| <b>Fe<sub>2</sub>P/NPC</b>                              | 0.997                          | 0.872                 | 3.95~3.99 | Carbon 158 (2020) 885-892                            |
| <b>Fe<sub>3</sub>C-Co/NC</b>                            | 0.94                           | 0.885                 | 3.9       | Adv. Funct. Mater. 2019, 29, 1901949                 |
| <b>Fe<sub>3</sub>C/NCNF</b>                             | 1.012                          | 0.873                 | ~3.98     | Carbon 142 (2019) 115-122                            |
| <b>Fe-NSDC</b>                                          | 0.96                           | 0.84                  | above 3.8 | Small 2019, 1900307                                  |
| <b>Fe<sub>3</sub>C/Fe<sub>2</sub>O<sub>3</sub>@NGNs</b> |                                | 0.86                  | 3.94      | Carbon 146 (2019) 763-771                            |
| <b>Fe<sub>3</sub>C@Fe,N,S-GCM</b>                       | 0.98                           | 0.779                 | 3.92      | Carbon 150 (2019) 93-100                             |
| <b>Fe<sub>3</sub>C@NP-PCFs</b>                          | 0.9037                         | 0.8015                | ~3.98     | J. Mater. Chem. A, 2019, 7, 17923-17936              |
| <b>Fe<sub>3</sub>C@NSC/900</b>                          | 1.059                          | 0.938                 | 3.94~3.97 | J. Mater. Chem. A, 2019, 7, 16920-16936              |
| <b>Fe-SAs/Fe<sub>3</sub>C-Fe@NC</b>                     |                                | 0.93                  | 3.9       | Small 2019, 1906057                                  |
| <b>FeS/Fe<sub>3</sub>C@NS-C-900</b>                     | 1.03                           | 0.78                  | 3.93      | ACS Appl. Mater. Interfaces 2020, 12, 44710-44719    |
| <b>Fe/N/C-1000-0.05</b>                                 | 0.98                           | 0.86                  |           | ACS Sustainable Chem. Eng. 2020, 8, 3208-3217        |
| <b>CoFe/FeNC</b>                                        |                                | 0.832                 | 3.98      | ACS Sustainable Chem. Eng. 2020, 8, 9009-9016        |
| <b>Fe-NCNWs</b>                                         |                                | 0.91                  | 3.98      | ACS Catal. 2019, 9, 5929-5934                        |
| <b>D-BNGFe-2-900</b>                                    | 0.95                           | 0.82                  | 3.96      | ACS Sustainable Chem. Eng. 2019, 7, 19104-19112      |

|                                                    |       |       |           |                                                                      |
|----------------------------------------------------|-------|-------|-----------|----------------------------------------------------------------------|
| <b>FeCN-S-800</b>                                  | 0.91  | 0.76  | 3.99      | ACS Sustainable Chem. Eng.<br>2019, 7, 3185-3194                     |
| <b>Fe/Fe<sub>3</sub>C@NC/CB</b>                    | 0.93  | 0.83  | 3.91~4.00 | Journal of Materials Science &<br>Technology 35 (2019) 2543-<br>2551 |
| <b>C-FeTA@g-C<sub>3</sub>N<sub>4</sub>-950-0.5</b> | 0.99  | 0.86  | 3.9       | Journal of Power Sources 417<br>(2019) 117-124                       |
| <b>Fe-N<sub>x</sub>-C-1</b>                        | 0.93  | 0.85  |           | Journal of Power Sources 412<br>(2019) 125-133                       |
| <b>Fe-N/P-C-700</b>                                | 0.941 | 0.867 | 3.94      | J. Am. Chem. Soc. 2020, 142,<br>2404-2412                            |
| <b>Fe<sub>2</sub>P(3 nm)@BC</b>                    | 0.96  | 0.82  | 3.9       | Journal of Power Sources 435<br>(2019) 226770                        |

<sup>a)</sup> the electron transfer numbers (n).

**Table. S5.** Summary of Onset potential ( $E_{\text{onset}}$ ) and half-wave potential ( $E_{1/2}$ ) for all the compared electrocatalysts in O<sub>2</sub>-saturated 0.1 M KOH solutions with a rotation speed of 1600 rpm and a sweep rate of 10 mV/s.

|                                             | $E_{\text{onset}}$ (V vs. RHE) | $E_{1/2}$ (V vs. RHE) | $I_d$ (mA/cm <sup>2</sup> ) |
|---------------------------------------------|--------------------------------|-----------------------|-----------------------------|
| <b>Fe<sub>2</sub>P@Fe<sub>3</sub>C/CNTs</b> | 1.060 V                        | 0.930 V               | 4.4 mA/cm <sup>2</sup>      |
| <b>sample-600</b>                           | 0.855 V                        | 0.685 V               | 0.55 mA/cm <sup>2</sup>     |
| <b>sample-800</b>                           | 1.025 V                        | 0.865 V               | 3 mA/cm <sup>2</sup>        |
| <b>sample-0.5C</b>                          | 0.775 V                        | 0.645 V               | 0.7 mA/cm <sup>2</sup>      |
| <b>sample-1.5C</b>                          | 1.020 V                        | 0.910 V               | 4.5 mA/cm <sup>2</sup>      |
| <b>sample-0.5P</b>                          | 1.055 V                        | 0.875 V               | 2.5 mA/cm <sup>2</sup>      |
| <b>sample-1.5P</b>                          | 0.805 V                        | 0.805 V               | 1.0 mA/cm <sup>2</sup>      |
| <b>Fe<sub>3</sub>C</b>                      | 0.970 V                        | 0.840 V               | 4 mA/cm <sup>2</sup>        |
| <b>Fe<sub>2</sub>P</b>                      | 0.830 V                        | 0.665 V               | 0.65 mA/cm <sup>2</sup>     |
| <b>25% Pt/C</b>                             | 1.040 V                        | 0.870 V               | 2.75 mA/cm <sup>2</sup>     |
